# Supplementary material for: Cholinium-amino acid based ionic liquids: a new method of synthesis and physico-chemical characterization
Source: Royal Society of Chemistry journal article supplement (doi:10.1039/c5cp01612f), 2015-01-01
Supplement: c5cp01612f1.pdf [file c5cp01612f1.pdf]

**ELECTRONIC SUPPLEMENTARY INFORMATION:**

**Cholinium-Amino Acid based Ionic Liquids: a new method of synthesis and physico-chemical characterization.**

Serena De Santis, Giancarlo Masci,\* Francesco Casciotta, Ruggero Caminiti, Eleonora Scarpellini, Marco Campetella, Lorenzo Gontrani.

Sapienza University of Rome, Department of Chemistry, Piazzale A. Moro 5, I-00185 Rome, Italy

\* giancarlo.masci@uniroma1.it

**Table of contents**

1. Structure of the cation and anions of [Ch][AA]ILs
2. <sup>1</sup>H NMR spectra for amino acid ionic liquids
3. <sup>13</sup>C NMR spectra for amino acid ionic liquids
4. Fitting parameters
5. Refractive index

**1. Structure of the cation and anions of [Ch][AA]ILs**

**Cation**

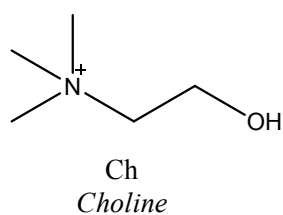

**Anions**

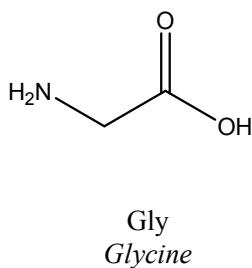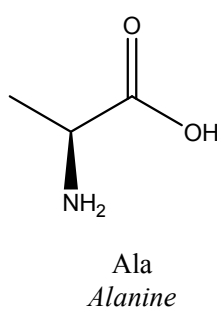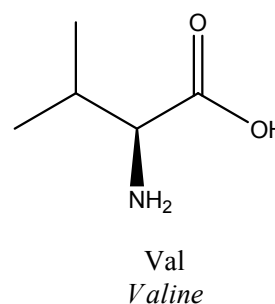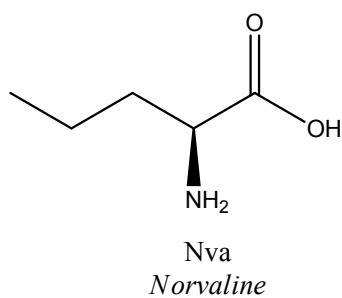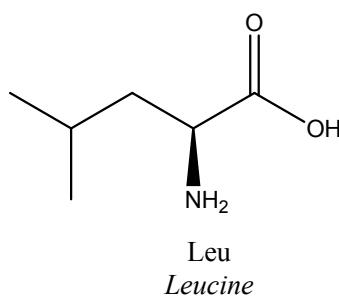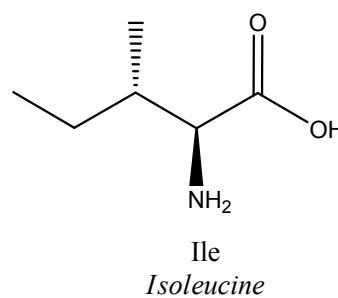

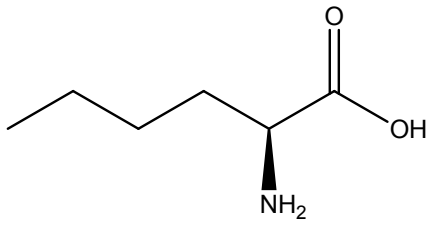

Nle  
*Norleucine*

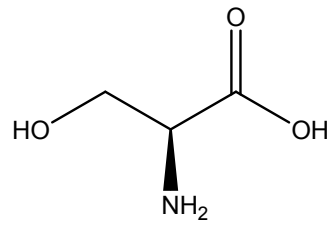

Ser  
*Serine*

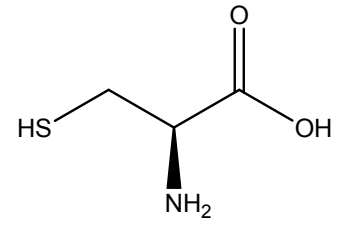

Cys  
*Cysteine*

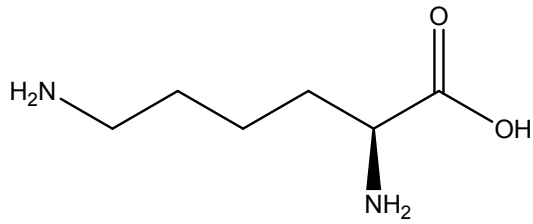

Lys  
*Lysine*

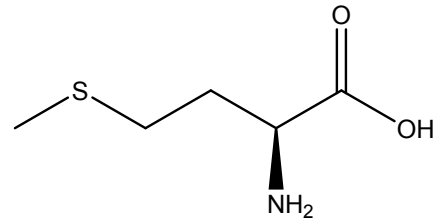

Met  
*Methionine*

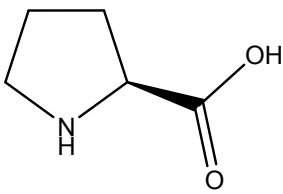

Pro  
*Proline*

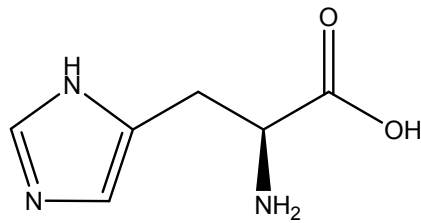

His  
*Histidine*

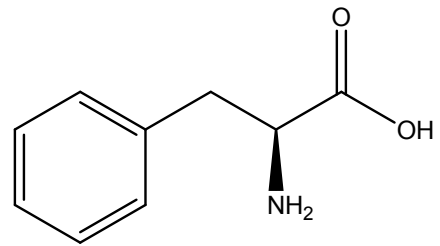

Phe  
*Phenylalanine*

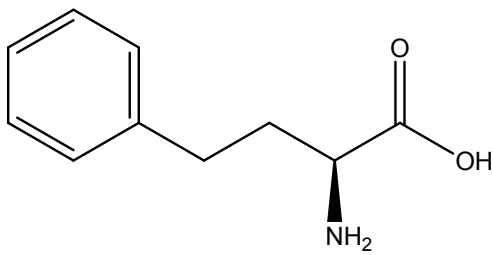

Hph  
*Homophenylalanine*

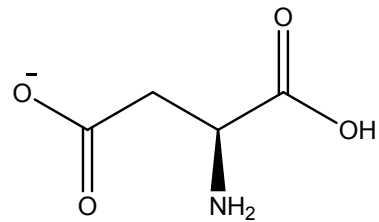

Asp  
*Aspartic Acid*

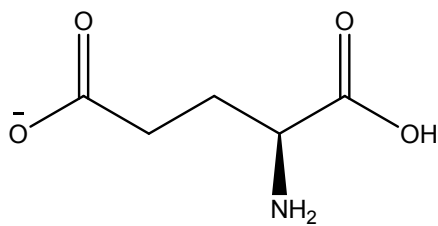

Glu  
*Glutamic Acid*

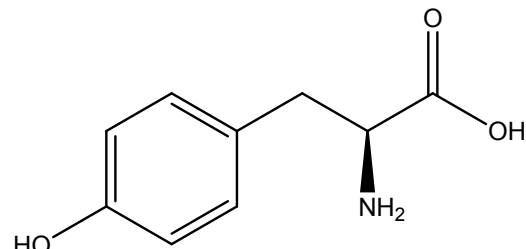

Tyr  
*Tyrosine*

## 2. $^1\text{H}$ NMR spectra for amino acid ionic liquids

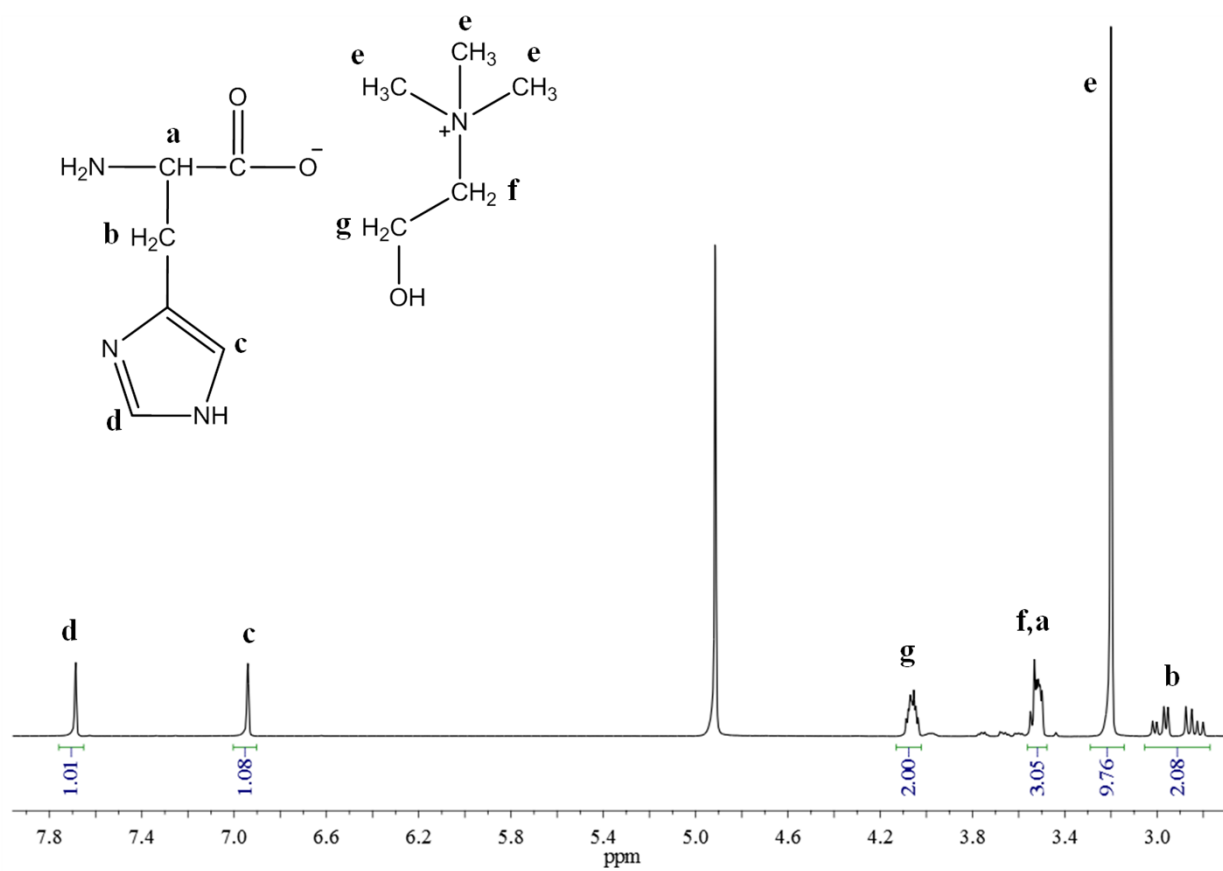

**S 1**  $^1\text{H}$  NMR spectra for  $[\text{Ch}][\text{His}]$  in  $\text{D}_2\text{O}$  at  $25^\circ\text{C}$ . The 1:1 stoichiometry of the IL is confirmed by the integrals ratio.

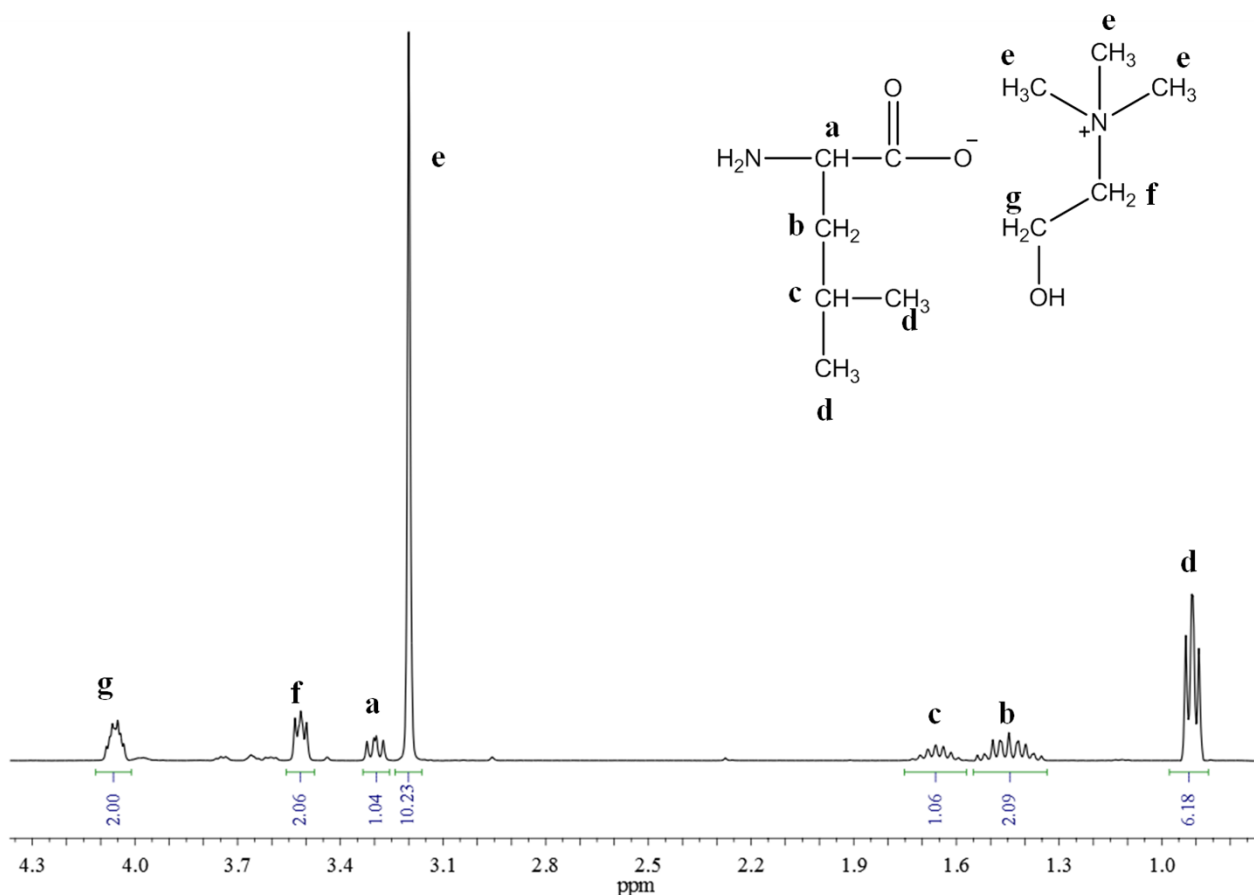

**S 2**  $^1\text{H}$  NMR spectra for [Ch][Leu] in  $\text{D}_2\text{O}$  at  $25^\circ\text{C}$ . Even if the excess of amino acid above the equivalence point has to be reduced due to solubility problems, 1:1 stoichiometry can be achieved.

**[Ch][Gly].**  $^1\text{H}$  NMR (300 MHz,  $\text{D}_2\text{O}$ )  $\delta$ : 3.19 (s, 2H,  $\text{CH}_2\text{-N}$ ), 3.22 (s, 9H,  $\text{CH}_3$ ,  $\text{CH}_3$ ,  $\text{CH}_3$ ), 3.52 – 3.55 (m, 2H,  $\text{CH}_2$ ), 4.06 – 4.10 (m, 2H,  $\text{CH}_2$ ).

**[Ch][Ala].**  $^1\text{H}$  NMR (300 MHz,  $\text{D}_2\text{O}$ )  $\delta$ : 1.23 (d, 3H,  $\text{CH}_3$ ), 3.20 (s, 9H,  $\text{CH}_3$ ,  $\text{CH}_3$ ,  $\text{CH}_3$ ), 3.31 (q, 1H,  $\text{CH-N}$ ), 3.47 – 3.56 (m, 2H,  $\text{CH}_2$ ), 4.01 – 4.08 (m, 2H,  $\text{CH}_2$ ).

**[Ch][Nva].**  $^1\text{H}$  NMR (300 MHz,  $\text{D}_2\text{O}$ )  $\delta$ : 0.91 (t, 3H,  $\text{CH}_3$ ), 1.24 – 1.40 (m, 2H,  $\text{CH}_2$ ), 1.49 – 1.57 (m, 2H,  $\text{CH}_2$ ), 3.20 (s, 9H,  $\text{CH}_3$ ,  $\text{CH}_3$ ,  $\text{CH}_3$ ), 3.26 (m, 1H,  $\text{CH-N}$ ), 3.51 (apparent t, 2H,  $\text{CH}_2$ ), 4.02 – 4.09 (m, 2H,  $\text{CH}_2$ ).

**[Ch][Leu].**  $^1\text{H}$  NMR (300 MHz,  $\text{D}_2\text{O}$ )  $\delta$ : 0.92 (t, 6H,  $\text{CH}_3$ ,  $\text{CH}_3$ ), 1.32 – 1.56 (m, 2H,  $\text{CH}_2$ ), 1.57 – 1.72 (m, 1H,  $\text{CH}$ ), 3.21 (s, 9H,  $\text{CH}_3$ ,  $\text{CH}_3$ ,  $\text{CH}_3$ ), 3.30 (q, 1H,  $\text{CH-N}$ ), 3.48 – 3.56 (apparent t, 2H,  $\text{CH}_2$ ), 4.05 – 4.09 (m, 2H,  $\text{CH}_2$ ).

**[Ch][Ile].**  $^1\text{H}$  NMR (300 MHz,  $\text{D}_2\text{O}$ )  $\delta$ : 0.86 – 0.92 (t, 3H,  $\text{CH}_3$ ; d, 3H,  $\text{CH}_3$ , overlap), 1.09 – 1.18 (m, 1H,  $\text{CH}_2$ ), 1.38 – 1.44 (m, 1H,  $\text{CH}_2$ ), 1.64 – 1.70 (m, 1H,  $\text{CH}$ ), 3.10 (d, 1H,  $\text{CH-N}$ ), 3.20 (s, 9H,  $\text{CH}_3$ ,  $\text{CH}_3$ ,  $\text{CH}_3$ ), 3.51 (apparent t, 2H,  $\text{CH}_2$ ), 4.03 – 4.07 (m, 2H,  $\text{CH}_2$ ).

**[Ch][Nle].**  $^1\text{H}$  NMR (300 MHz,  $\text{D}_2\text{O}$ )  $\delta$ : 0.88 (t, 3H,  $\text{CH}_3$ ), 1.20 – 1.38 (m, 4H,  $\text{CH}_2$ ,  $\text{CH}_2$ ), 1.51 – 1.66 (m, 2H,  $\text{CH}_2$ ), 3.20 (s, 9H,  $\text{CH}_3$ ,  $\text{CH}_3$ ,  $\text{CH}_3$ ), 3.27 (m, 1H,  $\text{CH-N}$ ), 3.51 (apparent t, 2H,  $\text{CH}_2$ ), 4.02 – 4.09 (m, 2H,  $\text{CH}_2$ ).

**[Ch][Ser].**  $^1\text{H}$  NMR (300 MHz,  $\text{D}_2\text{O}$ )  $\delta$ : 3.20 (s, 9H,  $\text{CH}_3$ ,  $\text{CH}_3$ ,  $\text{CH}_3$ ), 3.34 (t, 1H,  $\text{CH-N}$ ), 3.53 (apparent t, 2H,  $\text{CH}_2$ ), 3.72 (dd, 2H,  $\text{CH}_2$ ), 4.02 – 4.09 (m, 2H,  $\text{CH}_2$ ).

**[Ch][Lys].**  $^1\text{H}$  NMR (300 MHz,  $\text{D}_2\text{O}$ )  $\delta$ : 1.27 – 1.42 (m, 2H,  $\text{CH}_2$ ), 1.42 – 1.54 (m, 2H,  $\text{CH}_2$ ), 1.55 – 1.67 (m, 2H,  $\text{CH}_2$ ), 2.69 (t, 2H,  $\text{CH}_2$ ), 3.22 (s, 10H,  $\text{CH}_3$ ,  $\text{CH}_3$ ,  $\text{CH}_3$ ,  $\text{CH-N}$ ), 3.52 (apparent t, 2H,  $\text{CH}_2$ ), 3.87 – 4.13 (m, 2H,  $\text{CH}_2$ ).

**[Ch][Cys].**  $^1\text{H}$  NMR (300 MHz,  $\text{D}_2\text{O}$ )  $\delta$ : 2.73 – 2.91 (dd, 2H,  $\text{CH}_2$ ), 3.20 (s, 9H,  $\text{CH}_3$ ,  $\text{CH}_3$ ,  $\text{CH}_3$ ), 3.50 – 3.55 (t, 1H,  $\text{CH-N}$ ), 3.52 (apparent t, 2H,  $\text{CH}_2$ ), 4.03 – 4.09 (m, 2H,  $\text{CH}_2$ ).

**[Ch][Met].**  $^1\text{H}$  NMR (300 MHz,  $\text{D}_2\text{O}$ )  $\delta$ : 1.72 – 1.99 (m, 1H,  $\text{CH}_2$ ), 2.11 (s, 3H,  $\text{CH}_3$ ), 2.56 (t, 2H,  $\text{CH}_2$ ), 3.20 (s, 9H,  $\text{CH}_3$ ,  $\text{CH}_3$ ,  $\text{CH}_3$ ), 3.34 (t, 1H,  $\text{CH-N}$ ), 3.48 – 3.55 (apparent t, 2H,  $\text{CH}_2$ ), 4.05 – 4.10 (m, 2H,  $\text{CH}_2$ ).

**[Ch][Pro].**  $^1\text{H}$  NMR (300 MHz,  $\text{D}_2\text{O}$ )  $\delta$ : 1.69 – 1.80 (m, 3H,  $\text{CH}_2$ ,  $\text{CH}_2$ ), 2.06 – 2.18 (m, 1H,  $\text{CH}_2$ ), 2.74 – 2.87 (m, 1H,  $\text{CH}_2\text{-N}$ ), 3.01 – 3.14 (m, 1H,  $\text{CH}_2\text{-N}$ ), 3.20 (s, 9H,  $\text{CH}_3$ ,  $\text{CH}_3$ ,  $\text{CH}_3$ ), 3.47 – 4.47 (m, 3H,  $\text{CH-N}$ ,  $\text{CH}_2$ ), 4.03 – 4.08 (m, 2H,  $\text{CH}_2$ ).

**[Ch][His].**  $^1\text{H}$  NMR (300 MHz,  $\text{D}_2\text{O}$ )  $\delta$ : 2.79– 2.84 (m, 1H,  $\text{CH}_2$ ), 2.94– 2.99 (m, 1H,  $\text{CH}_2$ ), 3.18 (s, 9H,  $\text{CH}_3$ ,  $\text{CH}_3$ ,  $\text{CH}_3$ ), 3.46– 3.55 (m, 3H,  $\text{CH}_2$ ,  $\text{CH-N}$ ), 4.02– 4.06 (m, 2H,  $\text{CH}_2$ ), 6.94 (s, 1H,  $=\text{CH}$ ), 7.69 (s, 1H,  $=\text{CH}$ ).

**[Ch][Phe].**  $^1\text{H}$  NMR (300 MHz,  $\text{D}_2\text{O}$ )  $\delta$ : 2.85 – 2.99 (m, 1H,  $\text{CH}_2$ ), 3.02 – 3.14 (m, 1H,  $\text{CH}_2$ ), 3.21 (s, 9H,  $\text{CH}_3$ ,  $\text{CH}_3$ ,  $\text{CH}_3$ ), 3.51 (m, 2H,  $\text{CH}_2$ ), 3.56 (t, 1H,  $\text{CH-N}$ ), 4.05 – 4.09 (m, 2H,  $\text{CH}_2$ ), 7.32 – 7.50 (m, 5H,  $\text{C}_6\text{H}_5$ ).

**[Ch][Hph].**  $^1\text{H}$  NMR (300 MHz,  $\text{D}_2\text{O}$ )  $\delta$ : 1.80 – 2.00 (m, 2H,  $\text{CH}_2$ ), 2.61 – 2.76 (m, 2H,  $\text{CH}_2$ ), 3.21 (s, 9H,  $\text{CH}_3$ ,  $\text{CH}_3$ ,  $\text{CH}_3$ ), 3.31(t, 1H,  $\text{CH-N}$ ), 3.50 (m, 2H,  $\text{CH}_2$ ), 4.01 – 4.09 (m, 2H,  $\text{CH}_2$ ), 7.26 – 7.50 (m, 5H,  $\text{C}_6\text{H}_5$ ).

### 3. $^{13}\text{C}$ NMR spectra for amino acid ionic liquids

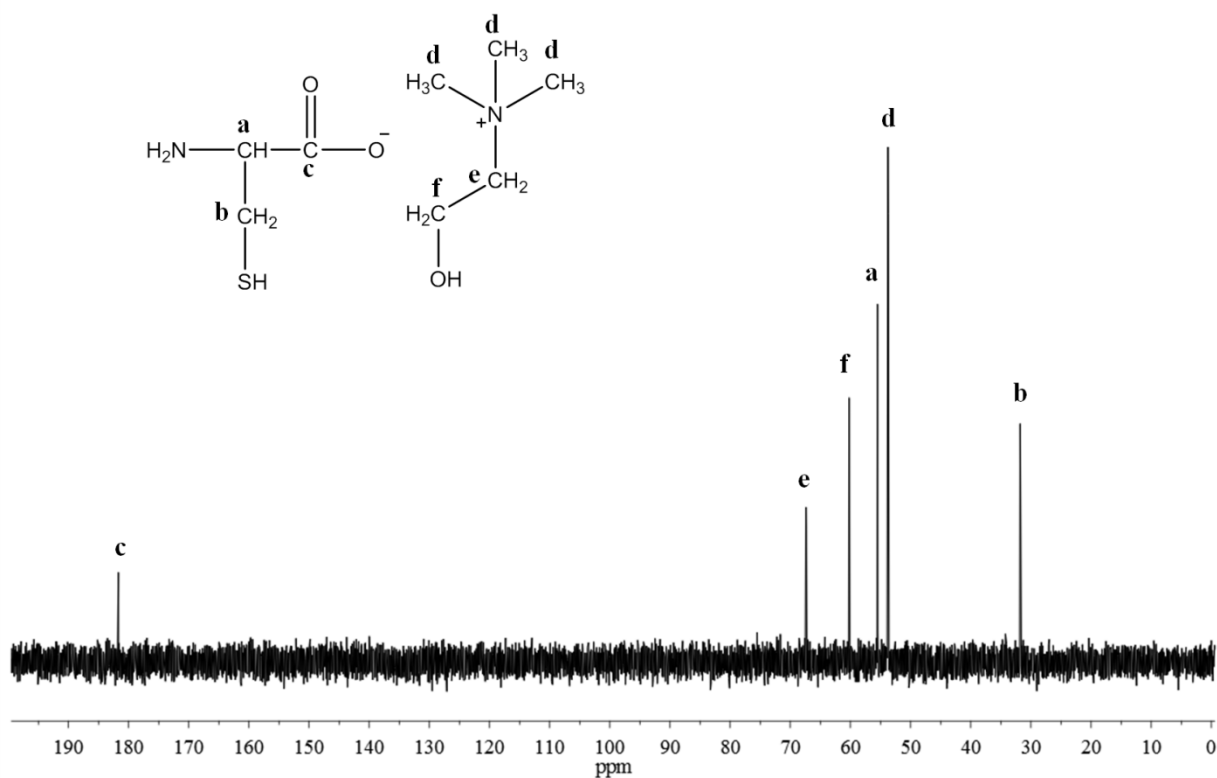

**S 3**  $^{13}\text{C}$  NMR spectra for [Ch][Cys] in  $\text{D}_2\text{O}$  at  $25^\circ\text{C}$ . The absence of a signal for a C bound to S-S demonstrates that no reductions of Cysteine occurred during the [Ch][Cys] preparation process.

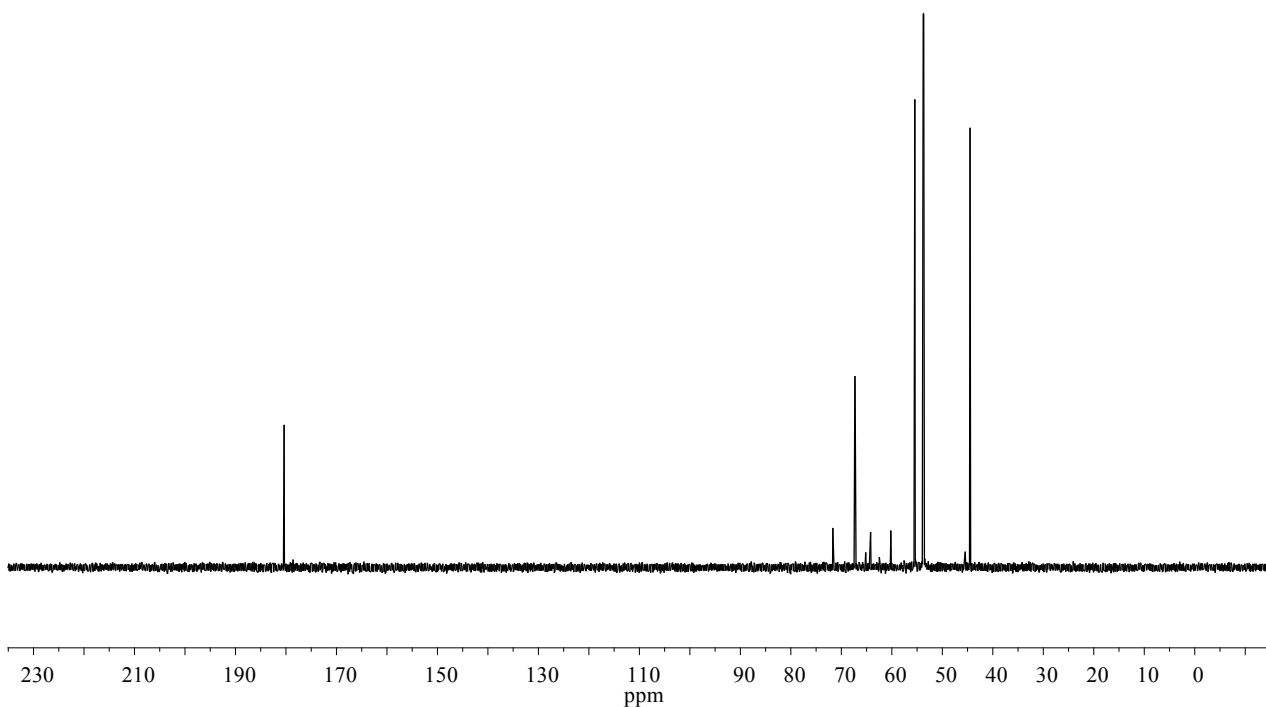

**S4**  $^{13}\text{C}$  NMR spectra for [Ch][Gly] in  $\text{D}_2\text{O}$  at  $25^\circ\text{C}$ .

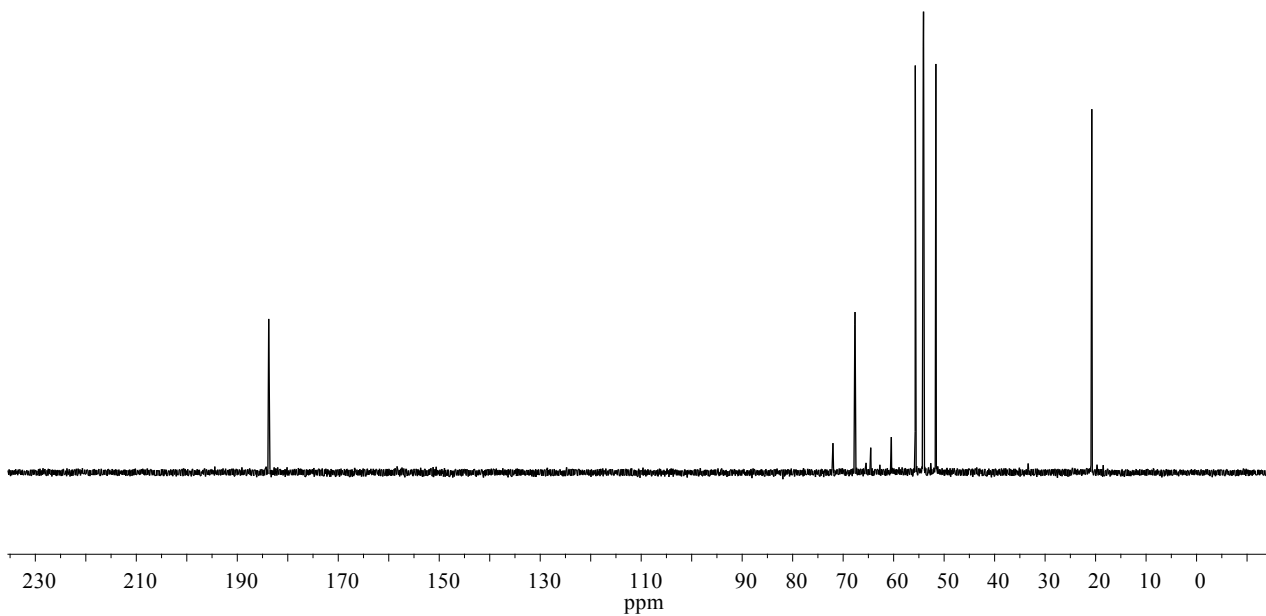

**S5**  $^{13}\text{C}$  NMR spectra for [Ch][Ala] in  $\text{D}_2\text{O}$  at  $25^\circ\text{C}$ .

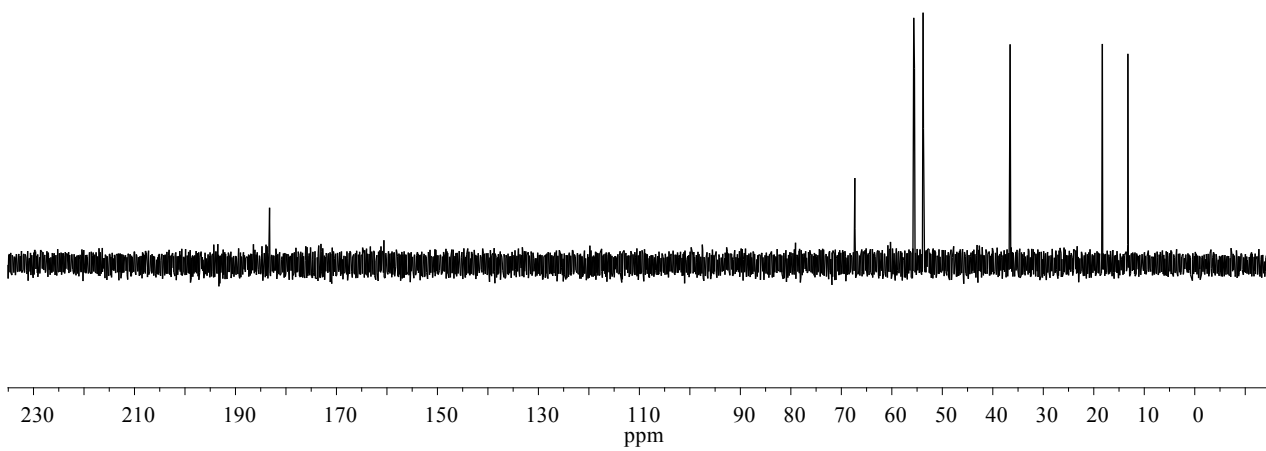

**S6**  $^{13}\text{C}$  NMR spectra for [Ch][Nva] in  $\text{D}_2\text{O}$  at  $25^\circ\text{C}$ .

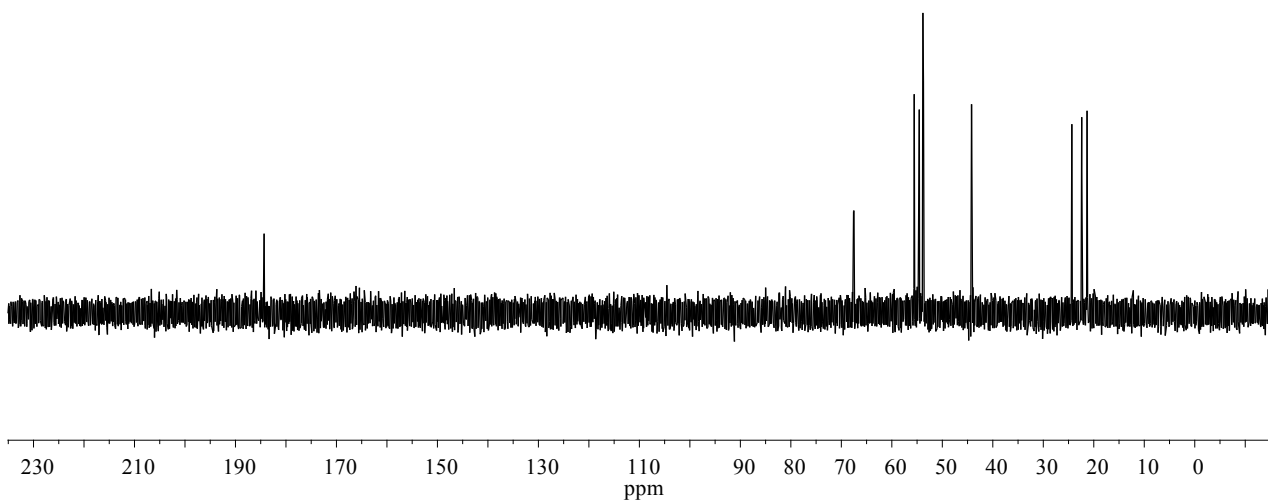

**S7**  $^{13}\text{C}$  NMR spectra for [Ch][Leu] in  $\text{D}_2\text{O}$  at  $25^\circ\text{C}$ .

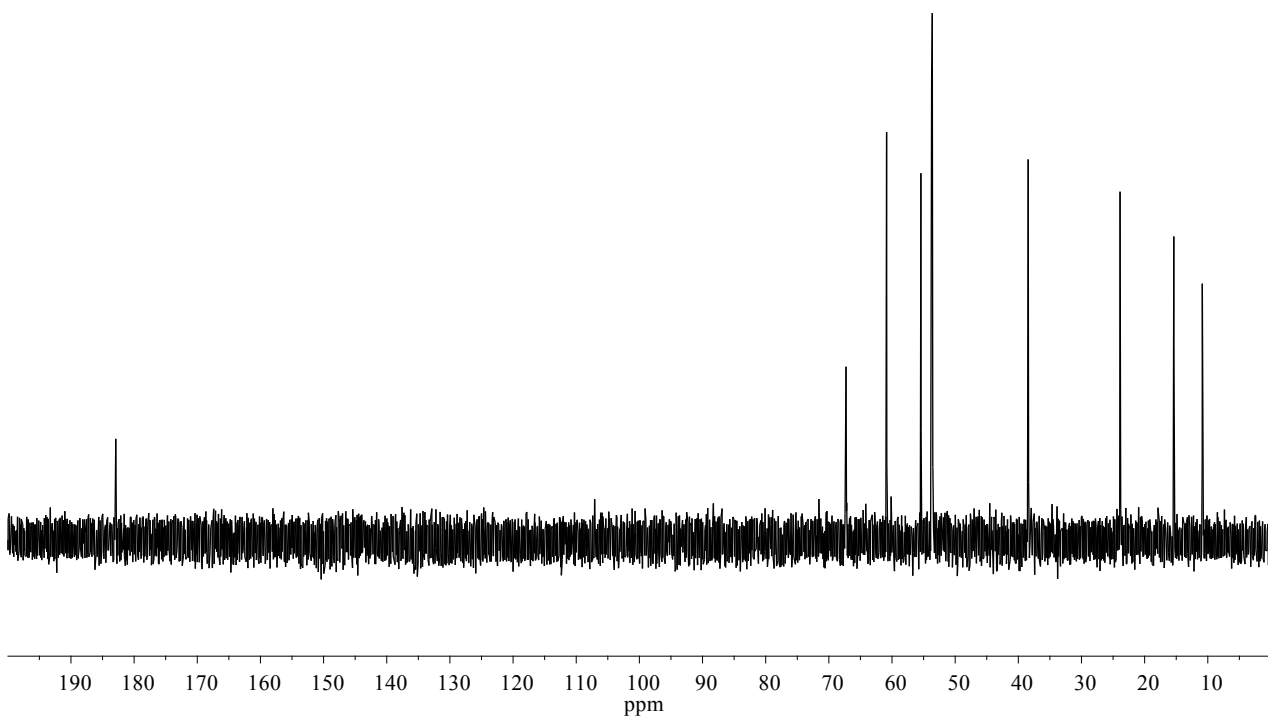

**S8**  $^{13}\text{C}$  NMR spectra for [Ch][Ile] in  $\text{D}_2\text{O}$  at  $25^\circ\text{C}$ .



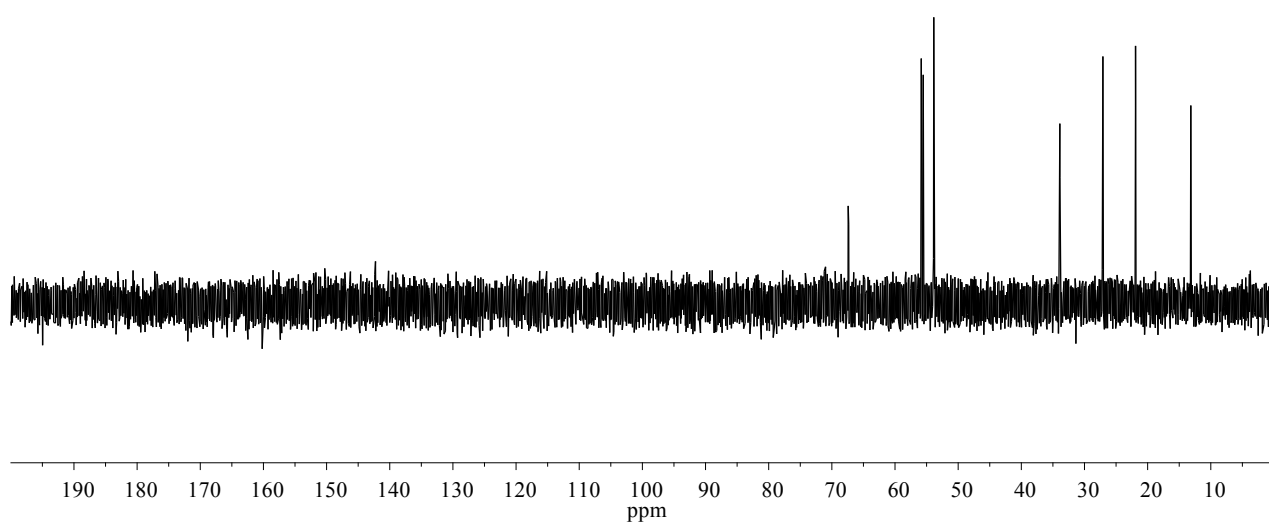

**S9**  $^{13}\text{C}$  NMR spectra for [Ch][Nle] in  $\text{D}_2\text{O}$  at  $25^\circ\text{C}$ .

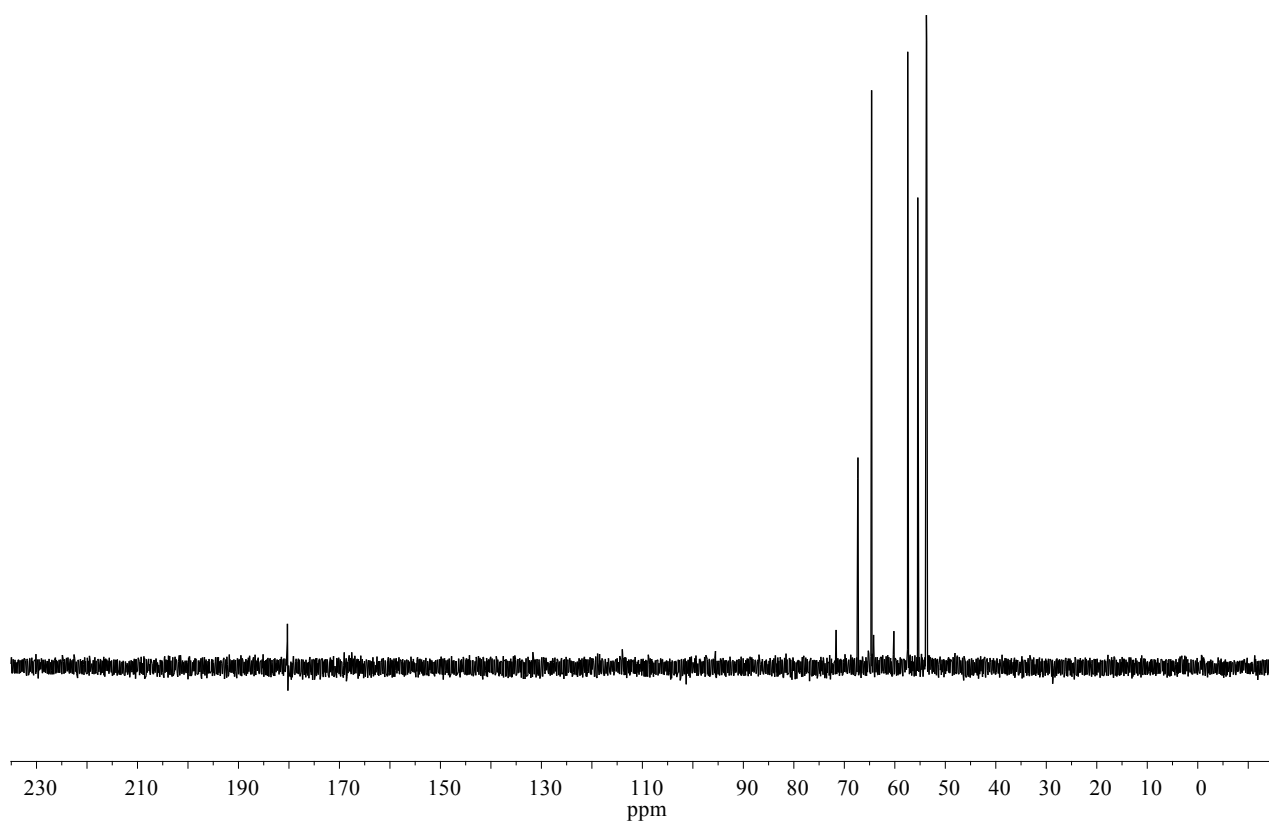

**S10**  $^{13}\text{C}$  NMR spectra for [Ch][Ser] in  $\text{D}_2\text{O}$  at  $25^\circ\text{C}$ .

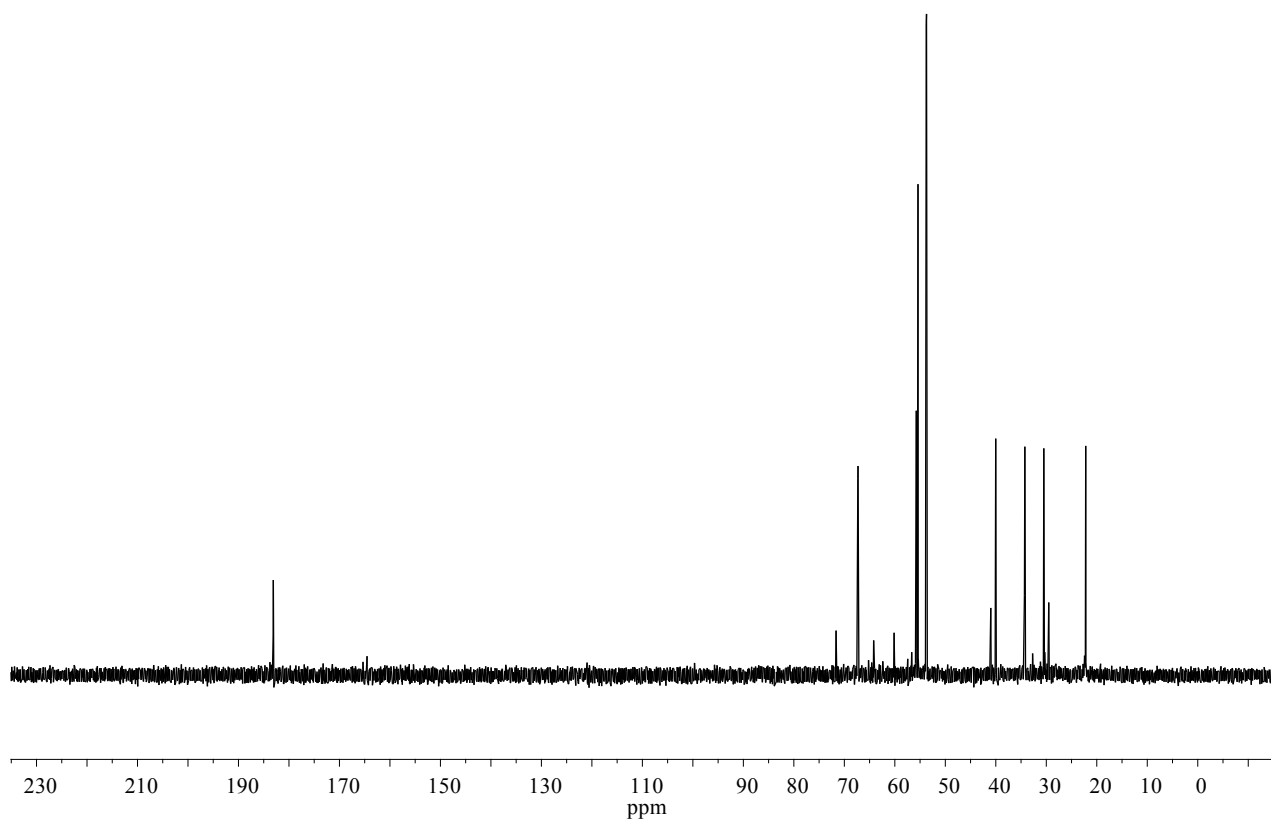

**S11**  $^{13}\text{C}$  NMR spectra for [Ch][Lys] in  $\text{D}_2\text{O}$  at  $25^\circ\text{C}$ .

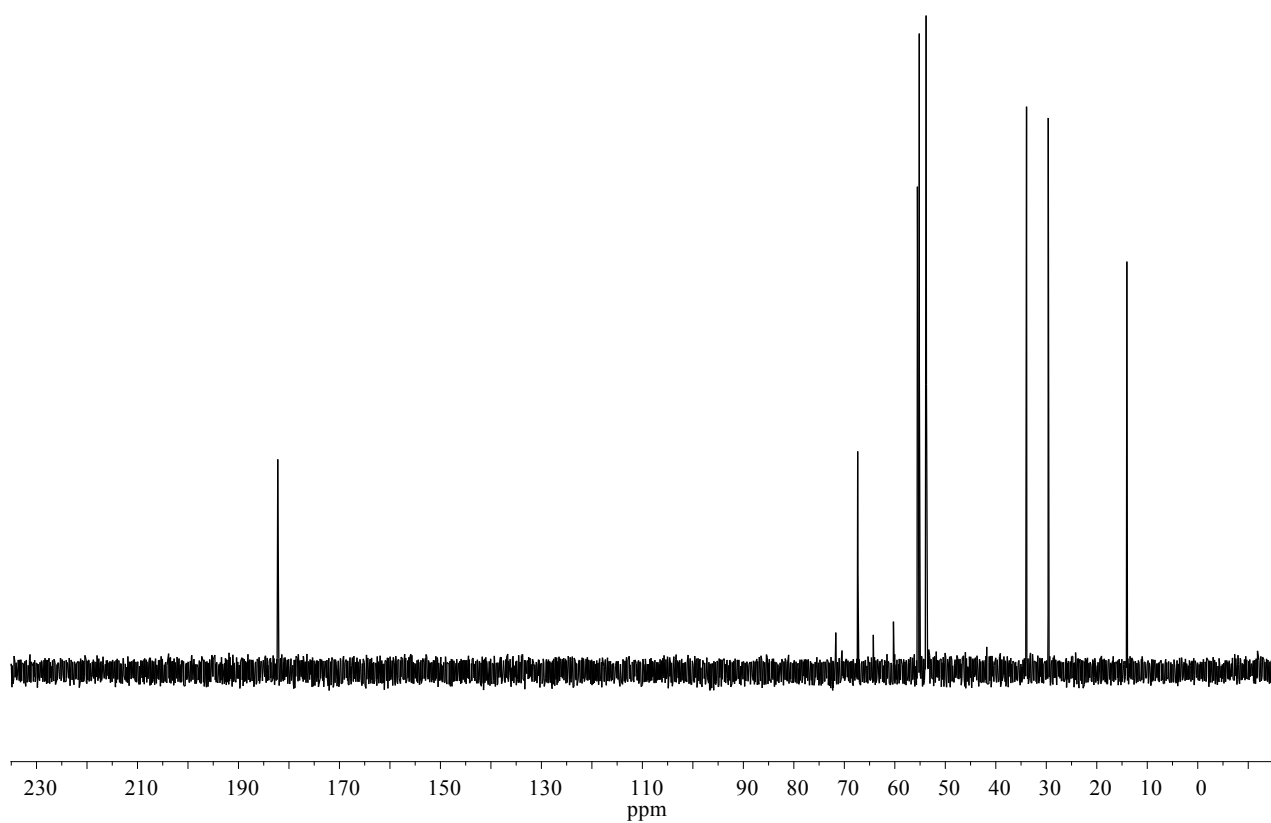

**S12**  $^{13}\text{C}$  NMR spectra for [Ch][Met] in  $\text{D}_2\text{O}$  at  $25^\circ\text{C}$ .

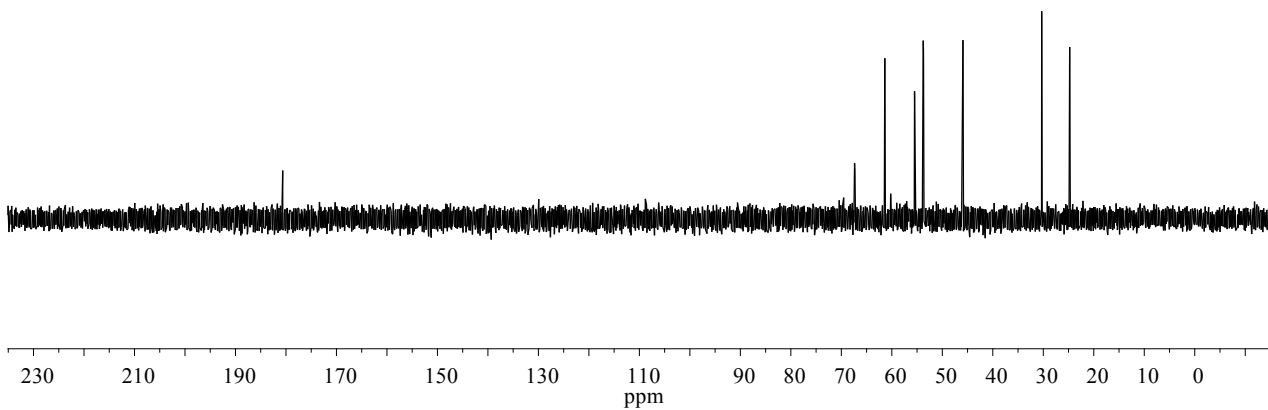

**S12**  $^{13}\text{C}$  NMR spectra for [Ch][Pro] in  $\text{D}_2\text{O}$  at  $25^\circ\text{C}$ .

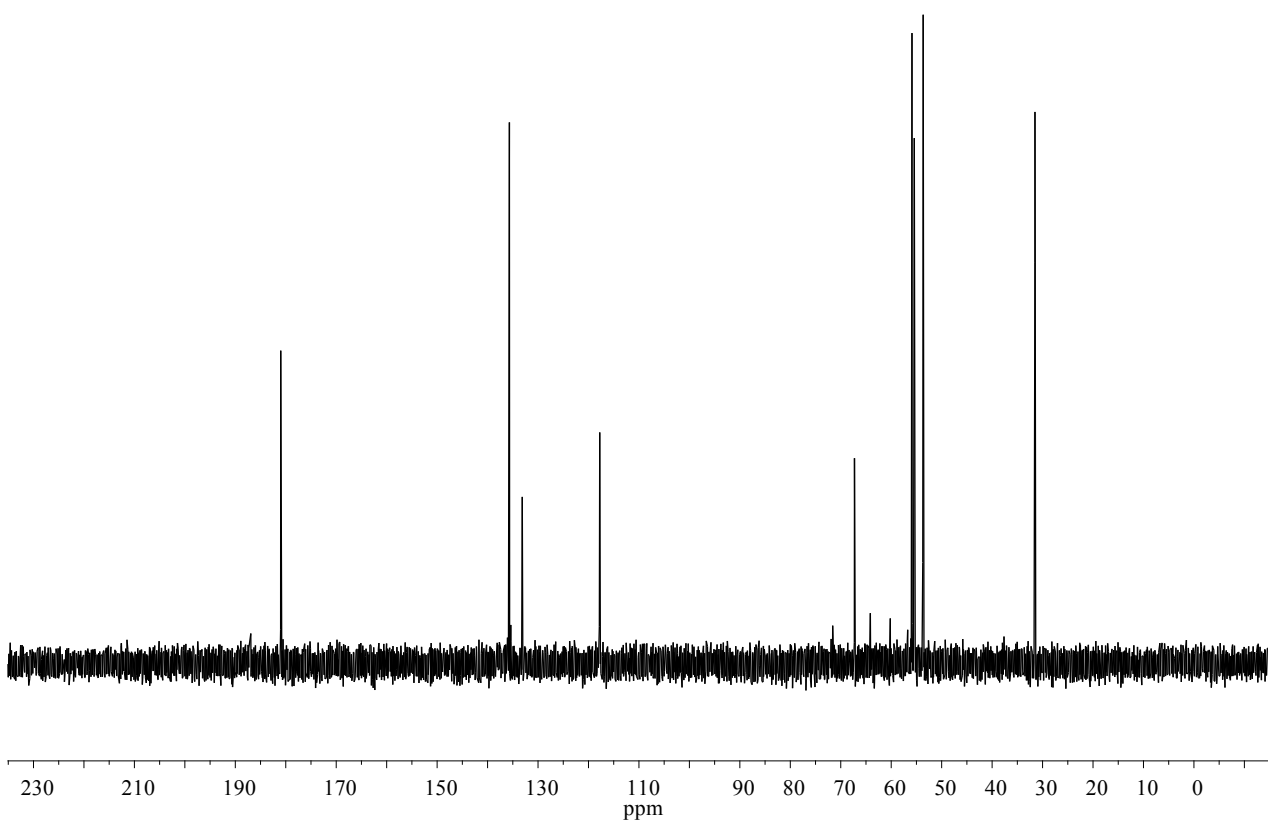

**S12**  $^{13}\text{C}$  NMR spectra for [Ch][His] in  $\text{D}_2\text{O}$  at  $25^\circ\text{C}$ .

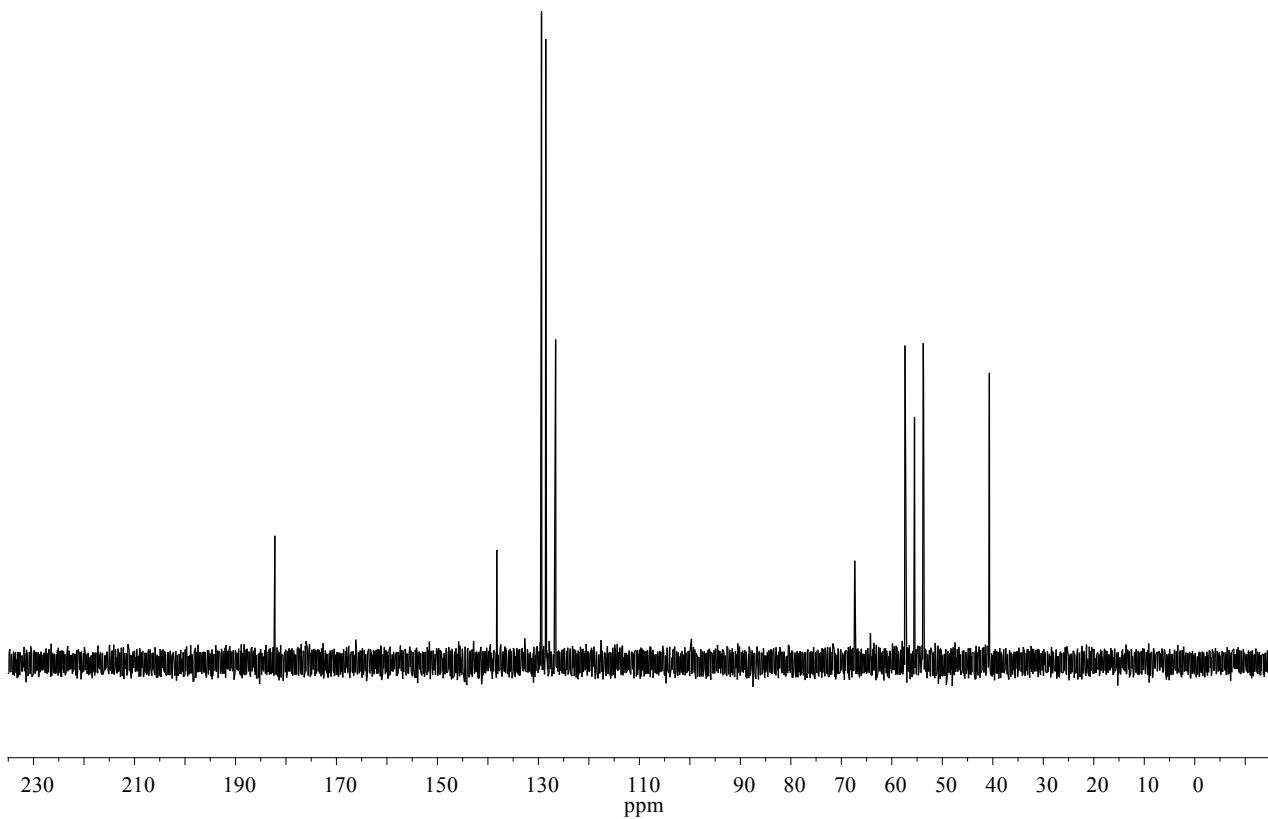

**S12**  $^{13}\text{C}$  NMR spectra for [Ch][Phe] in  $\text{D}_2\text{O}$  at  $25^\circ\text{C}$ .

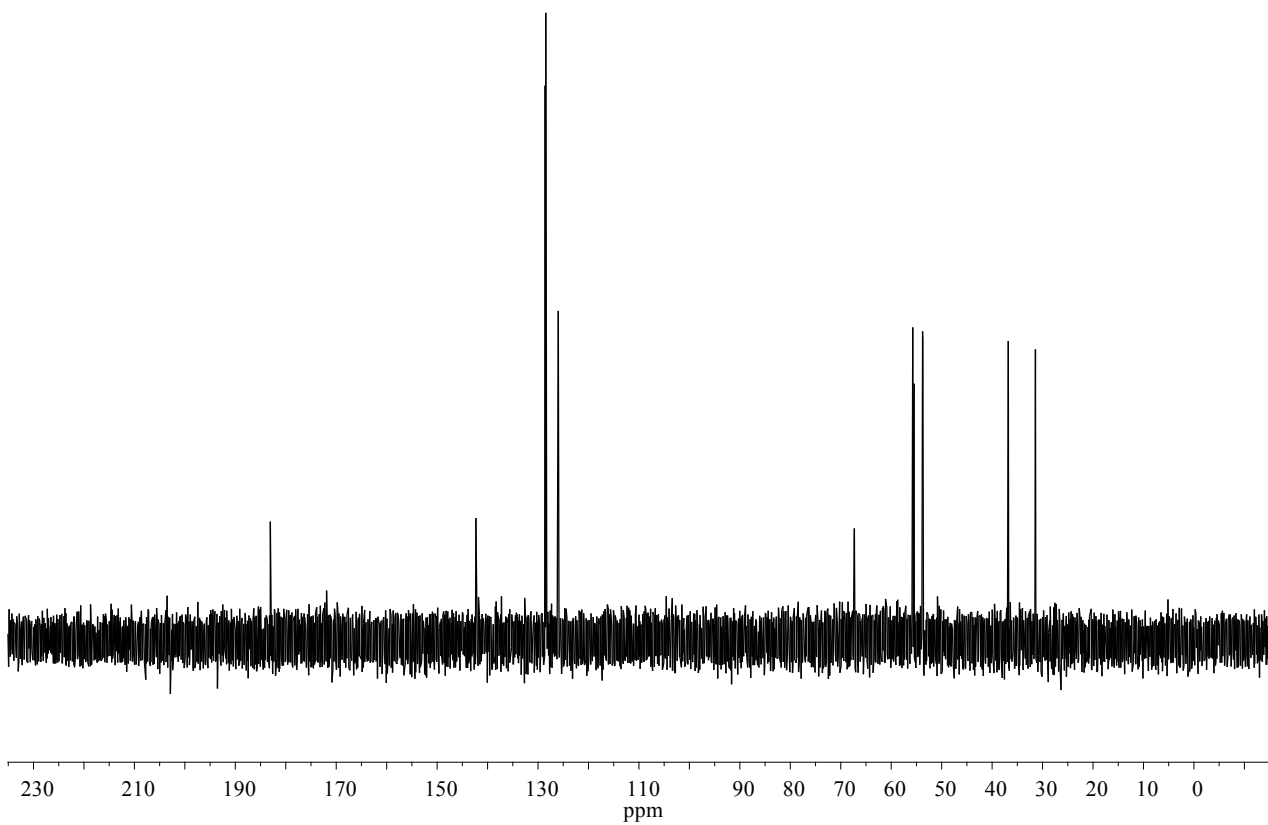

**S12**  $^{13}\text{C}$  NMR spectra for [Ch][Hph] in  $\text{D}_2\text{O}$  at  $25^\circ\text{C}$ .

#### 4. Fitting parameters

**Table S1** Fitting Parameters Values of eq. 4 and standard deviations  $\sigma_r$

|              | $A_2$   | $A_3$      | R        | $\sigma_r$ |
|--------------|---------|------------|----------|------------|
| <b>ChGly</b> | 1.56747 | -0.000221  | 0.994671 | 0.000264   |
| <b>ChAla</b> | 1.57642 | -0.0002705 | 0.998269 | 0.000184   |
| <b>ChNva</b> | 1.56079 | -0.0002392 | 0.998244 | 0.000164   |
| <b>ChLeu</b> | 1.56469 | -0.0002564 | 0.999021 | 0.000132   |
| <b>ChIle</b> | 1.52551 | -0.0001224 | 0.992725 | 0.000172   |
| <b>ChNle</b> | 1.56057 | -0.0002488 | 0.999725 | 6.78E-05   |
| <b>ChSer</b> | 1.57008 | -0.0002143 | 0.997656 | 0.000168   |
| <b>ChLys</b> | 1.56365 | -0.0001642 | 0.983666 | 0.000342   |
| <b>ChCys</b> | 1.59782 | -0.0002345 | 0.999253 | 0.000103   |
| <b>ChMet</b> | 1.60871 | -0.0002914 | 0.997793 | 0.000220   |
| <b>ChPro</b> | 1.60905 | -0.0003406 | 0.984309 | 0.000700   |
| <b>ChHis</b> | 1.60550 | -0.0002238 | 0.999695 | 6.20E-05   |
| <b>ChPhe</b> | 1.61804 | -0.0002583 | 0.992489 | 0.000363   |
| <b>ChHph</b> | 1.61975 | -0.0002741 | 0.999671 | 7.90E-05   |

$$\sigma_r = \sqrt{\frac{\sum_i [(n_D^{exp} - n_D^{cal})/n_D^{cal}]^2}{n - v}}$$

where  $n$  and  $v$  are the number of experimental points and adjustable parameters, respectively.

**Table S2** Fitting Parameters Values of eq. 5 and standard deviations  $\sigma_r$ 

|           | <b>A<sub>4</sub></b> | <b>A<sub>5</sub></b> | <b>A<sub>6</sub></b> | <b>R</b> | <b><math>\sigma_r</math></b> |
|-----------|----------------------|----------------------|----------------------|----------|------------------------------|
| [Ch][Gly] | 4.28E+06             | 1383.7               | 169.99               | 0.99995  | 0.02076                      |
| [Ch][Ala] | 3.89E+06             | 1359.3               | 173.39               | 0.99995  | 0.02238                      |
| [Ch][Ser] | 1.40E+06             | 1238.9               | 188.91               | 0.99997  | 0.04134                      |
| [Ch][Lys] | 3.17E+07             | 2398.9               | 160.23               | 0.99999  | 0.04013                      |
| [Ch][Pro] | 1.41E+06             | 1300.9               | 191.70               | 0.99997  | 0.05884                      |
| [Ch][Met] | 3.17E+07             | 2278.2               | 129.13               | 0.99994  | 0.04125                      |
| [Ch][Cys] | 2.69E+04             | 954.71               | 197.25               | 0.99926  | 0.08028                      |
| [Ch][Phe] | 9.97E+05             | 1128.3               | 207.43               | 0.99999  | 0.11121                      |
| [Ch][His] | 7.10E+05             | 1396.0               | 206.88               | 0.99962  | 0.23676                      |
| [Ch][Leu] | 2.67E+06             | 1472.6               | 178.15               | 0.99999  | 0.01399                      |
| [Ch][Ile] | 1.55E+06             | 1387.8               | 181.97               | 0.99997  | 0.07411                      |
| [Ch][Nle] | 3.29E+05             | 910.09               | 201.92               | 0.99990  | 0.14091                      |
| [Ch][Nva] | 2.26E+06             | 1389.3               | 174.18               | 0.99999  | 0.02196                      |
| [Ch][Hph] | 2.15E+06             | 1395.5               | 190.06               | 0.99997  | 0.10141                      |

$$\sigma_r = \sqrt{\frac{\sum_i [(\sigma_i^{exp} - \sigma_i^{cal}) / \sigma_i^{cal}]^2}{n - \nu}}$$

where  $n$  and  $\nu$  are the number of experimental points and adjustable parameters, respectively.

## 5. Refractive index

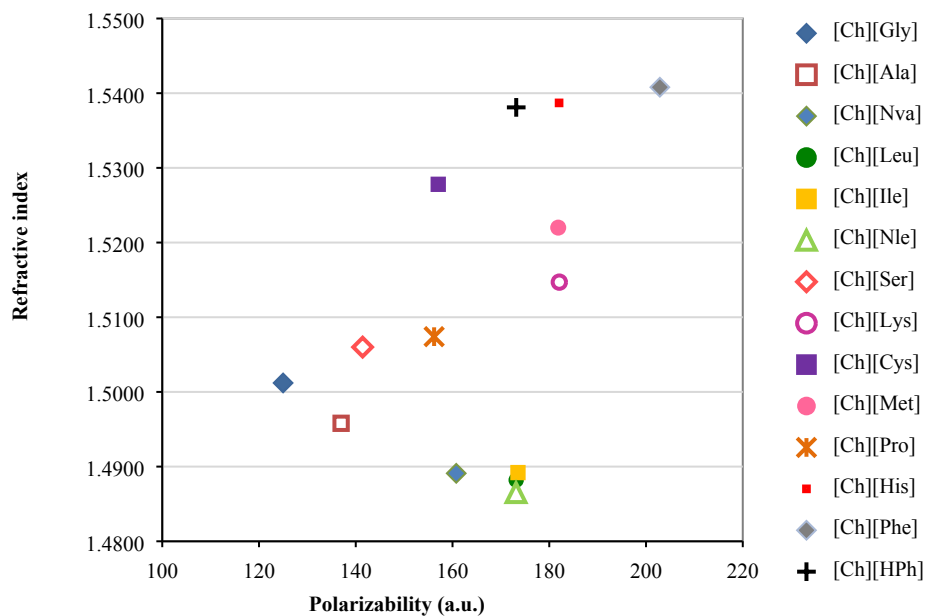

**S13** Refractive indices  $n_D$  at 25°C of [Ch][AA] ILs as a function of the molecular polarizability of the amino acid per molar volume. We determined the [Ch][AA]ILs polarizability according to the method proposed by Kassimi et al. (N. E. Kassimi, A. J. Thakkar, *Chem. Phys. Lett.*, 2009, **472**, 232–236.)
